## CHARACTERIZATION OF AN ENDOTHELIN ET<sub>B</sub> RECEPTOR IN THE GILL OF THE DOGFISH SHARK *SQUALUS ACANTHIAS*

DAVID H. EVANS\* AND MARK P. GUNDERSON

Department of Zoology, University of Florida, Gainesville, FL 32611, USA and Mount Desert Island Biological Laboratory, Salsbury Cove, ME 04672, USA

\*e-mail: dhefish@zoo.ufl.edu.

Accepted 7 October; published on WWW 29 November 1999

### Summary

Endothelins (ETs) are potent vasoconstrictive peptides that are secreted by the vascular endothelium and other tissues in vertebrates. Previous studies have demonstrated that ETs are expressed in a variety of fish tissues and contract various blood vessels. In order to determine if receptors for ET are expressed in fish gill tissue, we examined the binding kinetics of <sup>125</sup>I-labeled, human ET-1 to membrane fragments isolated from the gill of the dogfish shark, *Squalus acanthias*. <sup>125</sup>I-ET-1 bound at a single site, with a dissociation constant ( $K_d$ ) and binding site number ( $B_{max}$ ) very similar to those described in a variety of mammalian blood vessels. ET-1 and ET-3 competed equally with <sup>125</sup>I-ET-1, suggesting that the

receptor was ET<sub>B</sub>, which has been shown in mammalian systems to bind to both ligands equally. The ET<sub>B</sub>-specific agonists sarafotoxin S6c, IRL-1620, and BQ-3020 also competed against <sup>125</sup>I-ET-1 at a single site, supporting this hypothesis. We conclude that the shark gill expresses an ET<sub>B</sub> receptor with substantial homology to the mammalian receptor and that ET may play an important role in modulating such vital gill functions as gas exchange, ion regulation, acid–base balance, and excretion of nitrogen.

Key words: endothelin, receptor, *Squalus acanthias*, gill.

### Introduction

The endothelins (ETs) are considered to be the most potent vasoconstrictive agents in animals (e.g. Tamirisa et al., 1995). In addition to cardiovascular effects, it is now clear that ETs play a role in the function of many organs, including the pituitary, kidney and adrenal gland (e.g. Kennedy et al., 1993; Masaki, 1993). ET-1 was first isolated from endothelial cells, but ET-1 and the other members of the peptide family, ET-2 and ET-3, have been described from many tissues including the intestine, stomach, heart, kidney and brain of mammals (e.g. Masaki, 1993; Stjernquist, 1998).

The effects of the endothelins are mediated through at least two receptors, termed ET<sub>A</sub> and ET<sub>B</sub>, differentiated by their relative specificity for agonists and antagonists. ET<sub>A</sub> is much more sensitive to ET-1 than to either ET-2 or ET-3 and it is blocked by the inhibitor BQ-123. ET<sub>B</sub> is equally sensitive to all three ETs, and to the analogue sarafotoxin S6c (SRX S6c; originally isolated from the venom of the snake *Atractaspis engaddensis*) and various linear analogues of ET-1 (such as Ac-[Ala<sup>11,15</sup>]endothelin-1 (6-21), termed BQ-3020; and Suc-[Glu<sup>9</sup>, Ala<sup>11,15</sup>]endothelin-1 (8-21), termed IRL-1620) (e.g. Huggins et al., 1993; Hiley, 1995). In mammals, ET<sub>A</sub> receptors mediate the constrictory effect of ET on the vascular smooth muscle, although in some vessels, especially veins but also various arteries, constriction may be mediated *via* the ET<sub>B</sub> receptors (e.g. Sumner et al., 1992; Pollock and Opgenorth,

1993; Warner et al., 1993; Sudjarwo et al., 1994; Teerlink et al., 1994; White et al., 1994). More commonly, ET<sub>B</sub> receptors mediate the initial, transitory dilation produced by infusion of ET-1 (Spokes et al., 1989), which is now known to involve an autocrine action of ET on endothelial cells, stimulating the release of the endothelium-derived relaxing factor, nitric oxide (De Nucci et al., 1988; Rubanyi and Polokoff, 1994). In fact, there is some suggestion that distinct ET<sub>B</sub> receptors, termed ET<sub>B1</sub> and ET<sub>B2</sub>, may mediate dilation *versus* constriction, respectively (e.g. Warner et al., 1993; Bax and Saxena, 1994; Sudjarwo et al., 1994; Teerlink et al., 1994; Zuccarello et al., 1998a), although this hypothesis is not universally accepted (e.g. Clozel and Gray, 1995).

There is an emerging literature demonstrating that ET and its receptors are present in fish tissues, but little is known about the physiology of endothelin in this group. Immunoreactive ET has been localized in the brain of the lamprey, *Lampetra japonica*, and the caudal neurosecretory system, gill and kidney of the teleost, *Oryzias latipes* (medaka) (Kasuya et al., 1991) as well as the gills of the Indian catfish (*Heteropneustes fossilis*), brown trout (*Salmo trutta*), electric ray (*Torpedo marmorata*), dogfish shark (*Scyliorhinus canicula*) and bowfin (*Amia calva*) (Zaccone et al., 1996). In addition, ET-1 constricted various blood vessels (e.g. ventral aorta, coronary artery, mesenteric artery, posterior cardinal vein or

celiacomesenteric artery) from the catfish (*Amiurus melas*) (Poder et al., 1991), rainbow trout (*Oncorhynchus mykiss*) (Olson et al., 1991), Atlantic salmon (*Salmo salar*) and cod (*Gadus morhua*) (Sverdrup et al., 1994) and *S. acanthias* (Evans et al., 1996). We have also recently determined that the ventral aortae of the lamprey (*Petromyzon marinus*), Atlantic hagfish (*Myxine glutinosa*), Florida gar (*Lepisosteus platyrhynchus*), gulf toadfish (*Opsanus beta*), American eel (*Anguilla rostrata*) and African lungfish (*Protopterus aethiopicus*) constrict when ET-1 is applied (D. H. Evans, unpublished). It is clear, therefore, that at least vascular receptors for ET arose before the earliest vertebrates. Indeed, immunoreactive ET has been described in the nervous system of invertebrates (Kasuya et al., 1991). In all but one of the functional studies in fishes, the specific ET receptor was not delineated; however, we determined that an ET<sub>B</sub> receptor mediates the constrictory response in the ventral aorta of *S. acanthias* (Evans et al., 1996).

The fish gill is a structurally complex organ that plays a vital role in such important processes as gas exchange, ion regulation, acid-base regulation and excretion of nitrogenous waste products (e.g. Evans, 1998). We have previously shown that the gills of various species (*M. glutinosa*, *S. acanthias* and *O. beta*) express receptors for natriuretic peptides (Donald et al., 1994, 1997; Toop et al., 1995), although the precise location of the receptors (vascular *versus* epithelial) is still unknown. To begin to access the role of endothelins in fish gill function, we have characterized ET binding to membrane fragments isolated from the gill of the dogfish shark, *S. acanthias*.

### Materials and methods

Adult spiny dogfish *Squalus acanthias* (L.) (3–5 kg) were netted in Frenchman Bay, Maine, USA and maintained in live cars with running sea water (12–15 °C) at the Mount Desert Island Biological Laboratory (Salsbury Cove, ME, USA) for at least 24 h before use. Fish were killed by pithing through the snout, and gills were removed and frozen immediately in liquid N<sub>2</sub>. The tissue was stored at –70 °C before shipment to the University of Florida on dry ice.

Membrane fragments were prepared as described previously (e.g. Donald et al., 1997). Gill tissue was scraped off the gill arch and homogenized in 3–5 volumes of buffer (50 mmol l<sup>-1</sup> Tris-HCl, 1 mmol l<sup>-1</sup> NaHCO<sub>3</sub>, pH 7.4 at room temperature (RT); 24 °C) using a Tissue-Tearor (Biospec, Bartlesville, OK, USA). The homogenate was diluted 1:1 with a buffer solution containing 50 mmol l<sup>-1</sup> Tris-HCl, 1 mmol l<sup>-1</sup> EDTA and 1 mmol l<sup>-1</sup> MgCl<sub>2</sub> (pH 7.4), and centrifuged at 800 g for 15 min at 4 °C. The supernatant was poured through three layers of cheesecloth into a second tube and spun at 30,000 g for 20 min at 4 °C. This supernatant was discarded, and the pellet was washed with a solution of 50 mmol l<sup>-1</sup> Tris-HCl and 250 mmol l<sup>-1</sup> sucrose (pH 7.4 at RT) and resuspended in the same solution (250–500 µl). A subsample was taken for protein analysis (BCA Protein Assay Kit, Pierce), the rest subdivided and stored at –70 °C until use.

For the kinetic analysis of the binding of <sup>125</sup>I-ET-1 to a putative membrane receptor, 50 µg of gill protein was incubated at RT in 250 µl of a buffer solution [50 mmol l<sup>-1</sup> Tris-HCl, 100 mmol l<sup>-1</sup> NaCl, 5 mmol l<sup>-1</sup> MgCl<sub>2</sub>, 0.25 % bovine serum albumin, 0.05 % Bacitracin, 4 µg ml<sup>-1</sup> Leupeptin, 2 µg ml<sup>-1</sup> Chymostatin, 2 µg ml<sup>-1</sup> Pepstatin and 1 µg ml<sup>-1</sup> phenylmethyl-sulfonyl fluoride (PMFS) and 10<sup>-12</sup>–10<sup>-6</sup> mol l<sup>-1</sup> <sup>125</sup>I-ET-1 (Peninsula Laboratories, Belmont, CA, USA)]. Preliminary experiments determined that 90 min incubation was sufficient for maximal binding. Non-specific binding was measured by including 10<sup>-6</sup> mol l<sup>-1</sup> ET-1 in a separate set of incubation tubes containing the incubation buffer, gill protein and concentration range of radiolabeled ET-1. For competition assays, the same protocol was used, except that each reaction tube contained 30 pmol l<sup>-1</sup> <sup>125</sup>I-ET-1 and specific concentrations of either unlabelled ET-1 or putative competitive agonists or antagonists for either ET<sub>A</sub> or ET<sub>B</sub> receptors. In all experiments, binding was terminated by addition of 2 ml of ice-cold 50 mmol l<sup>-1</sup> Tris-HCl and 100 mmol l<sup>-1</sup> NaCl (pH 7.4), and bound and free ligand were separated by vacuum filtration through a Whatman GF/C filter, pretreated with 1 % polyethylenimine. The filters were then washed with 5 ml of the ice-cold washing buffer, placed in glass vials and assayed on a Beckman gamma counter with 78 % efficiency.

ET-1 (human) and ET-3 (human) were purchased from American Peptide (Sunnyvale, CA) and dissolved in 1 % acetic acid, divided into portions, evaporated to dryness (SpeedVac; Savant, Framingdale, NY, USA) and stored at –70 °C until use. SRX S6c, BQ-3020, IRL-1620 and RES-701-1 (Gly-Asn-Trp-His-Gly-Thr-Ala-Pro-Asp-Trp-Phe-Phe-Asn-Tyr-Tyr-Trp) were also purchased from American Peptide, dissolved in 5 % dimethylsulfoxide (DMSO) and portions stored at –70 °C until use. Maximal DMSO concentration in the final reaction solution was 0.05 %. All data analysis (non-linear regression for saturation and competitive binding, and Student's *t*-test)

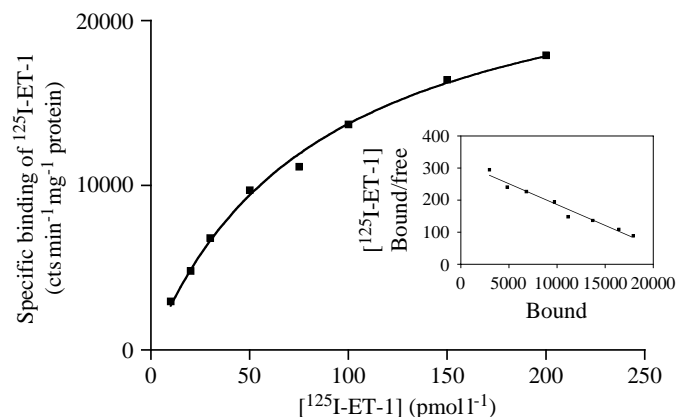

Fig. 1. Representative saturation binding curve of <sup>125</sup>I-ET-1 to gill membranes from *Squalus acanthias*. Inset: Scatchard analysis of the binding data.

used Prism (GraphPad, Inc., San Diego, CA, USA). Data are expressed as mean  $\pm$  S.E.M.

### Results

$^{125}\text{I}$ -ET-1 binding to shark gill membranes was saturable, with an apparent dissociation constant  $K_d$  of  $68.8 \pm 10.9 \text{ pmol l}^{-1}$  and a binding site number  $B_{\text{max}}$  of  $780 \pm 59.7 \text{ fmol mg}^{-1}$  protein ( $N=3$ ), calculated by non-linear regression (Fig. 1). In all three binding experiments, non-linear regression equations for one- versus two-site models were tested using Prism; in every case, the single-site equation provided the best fit. The Scatchard analysis (Fig. 1) also indicated a single binding site.

Unlabeled ET-1 competed with  $^{125}\text{I}$ -ET-1 at a single site with a 50% inhibition constant  $\text{IC}_{50}$  of  $5.11 \pm 0.99 \text{ nmol l}^{-1}$

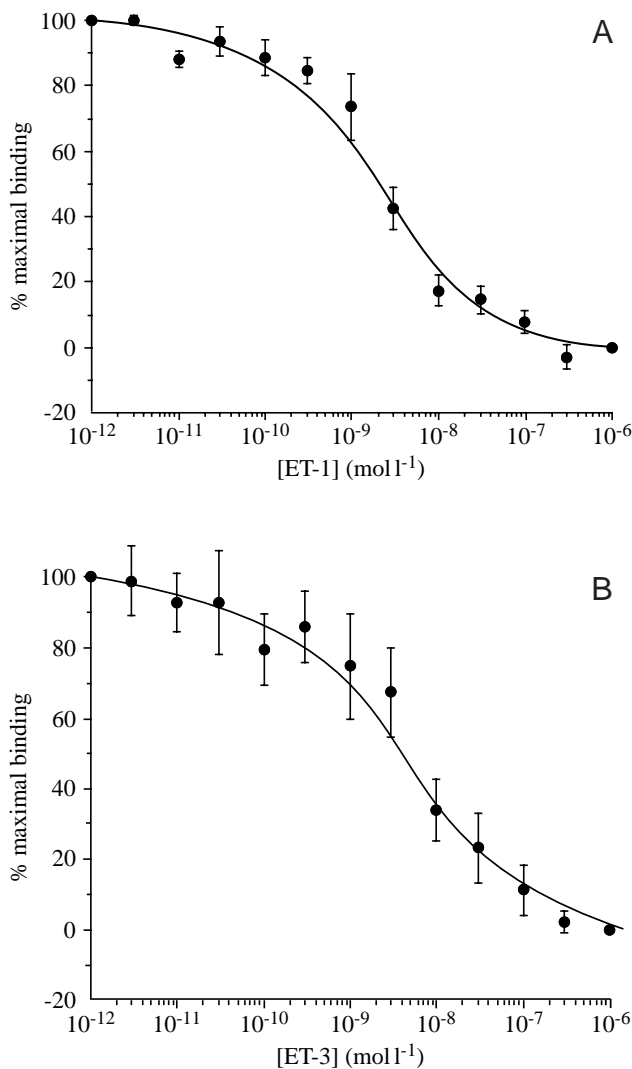

Fig. 2. Plot of competition between unlabeled human ET-1 (A) or ET-3 (B) and  $^{125}\text{I}$ -ET-1 for binding to gill membranes. Data were normalized so that maximal competition (zero binding of  $^{125}\text{I}$ -ET-1) was assumed to be at  $10^{-6} \text{ mol l}^{-1}$  unlabelled ET-1 or ET-3. Values are means  $\pm$  S.E.M.;  $N=7-11$  for ET-1 and  $6-7$  for ET-3; the curves were fitted by eye.

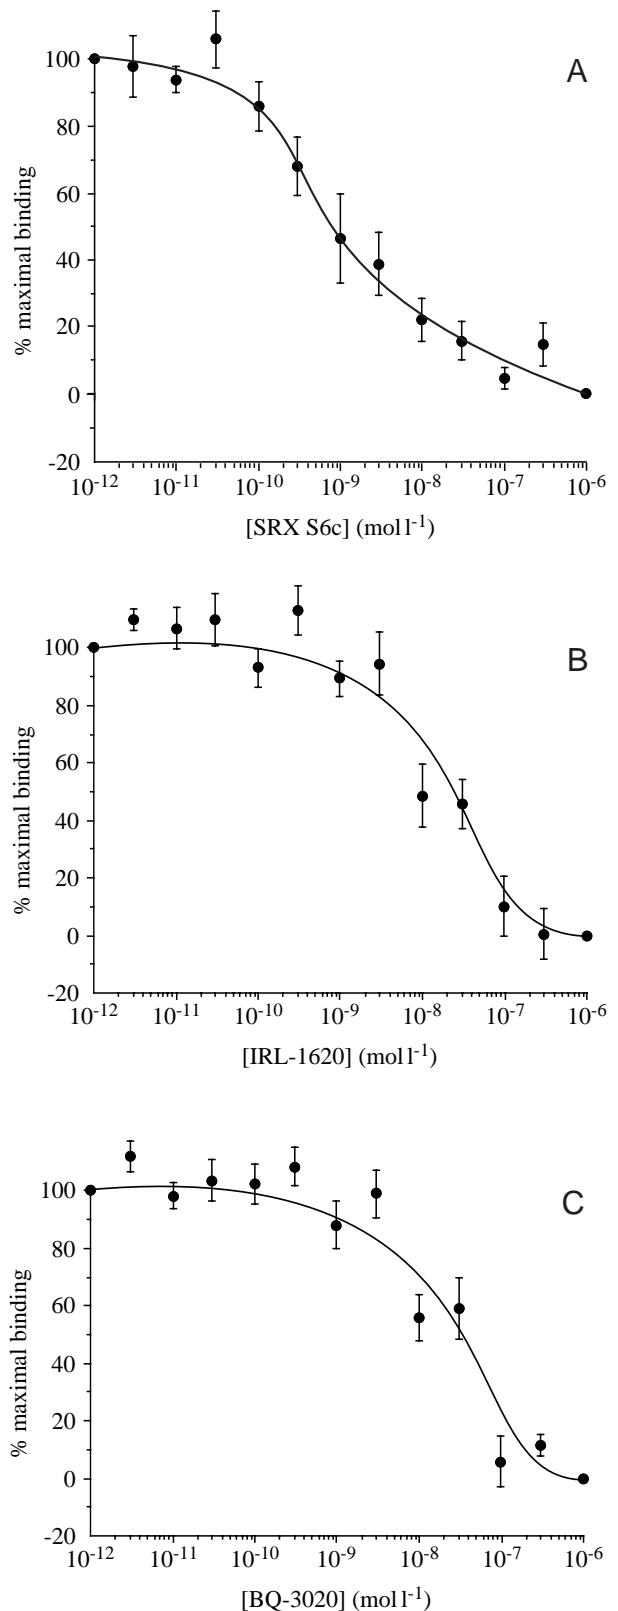

Fig. 3. Plot of competition between SRX S6c (A,  $N=8-9$ ), IRL 1620 (B,  $N=7$ ) and BQ-3020 (C,  $N=6-7$ ) and  $^{125}\text{I}$ -ET-1 for binding to gill membranes. Data were normalized so that maximal competition (zero binding of  $^{125}\text{I}$ -ET-1) was assumed to be at  $10^{-6} \text{ mol l}^{-1}$  for each agonist. Values are means  $\pm$  S.E.M.

Table 1. *Published kinetic characteristics of endothelin receptors in mammalian blood vessels*

| Species       | Tissue                      | $K_d$<br>( $\text{pmol l}^{-1}$ ) | $B_{\text{max}}$<br>( $\text{fmol mg}^{-1}$ protein) | Reference                 |
|---------------|-----------------------------|-----------------------------------|------------------------------------------------------|---------------------------|
| Dogfish shark | Gill                        | 68.8                              | 780                                                  | Present study             |
| Rat           | Renal microvessels          | 20.1                              | 1343                                                 | Edwards and Trizna (1995) |
| Rabbit        | Renal microvessels          | 21.5                              | 810                                                  | Edwards and Trizna (1995) |
| Rat           | Preglomerular vessels       | 310                               | 1336                                                 | De Leon (1995)            |
| Human         | Cerebral resistance vessels | 800                               | 690                                                  | Yu et al. (1995)          |
| Human         | Pulmonary artery            | 850                               | 15.2                                                 | Davenport (1995)          |
| Human         | Coronary artery             | 140                               | 71.0                                                 | Davenport (1995)          |
| Human         | Aorta                       | 510                               | 9.4                                                  | Davenport (1995)          |

$K_d$ , dissociation constant;  $B_{\text{max}}$ , binding site number.

( $N=10$ ; Fig. 2A). The inhibitor constant  $K_i$  was calculated to be  $3.57 \pm 0.69 \text{ nmol l}^{-1}$ , using the method of Cheng and Prusoff (1973). ET-3 also competed with  $^{125}\text{I}$ -ET-1 at a single site with an  $\text{IC}_{50}$  of  $8.93 \pm 4.90 \text{ nmol l}^{-1}$  ( $N=6$ ; Fig. 2B), not significantly different from the  $\text{IC}_{50}$  of ET-1 ( $P=0.4$ ). The  $\text{ET}_B$ -specific agonists SRX S6c, IRL-1620 and BQ-3020 also displaced the radiolabeled ET-1 (Fig. 3A–C) with high efficacy:  $\text{IC}_{50}=1.77 \pm 1.31 \text{ nmol l}^{-1}$  ( $N=8$ ),  $32.8 \pm 18.7 \text{ nmol l}^{-1}$  ( $N=7$ ) and  $37.2 \pm 13.5 \text{ nmol l}^{-1}$  ( $N=7$ ), respectively. All competitions were at a single site. Only the  $\text{IC}_{50}$  of BQ-3020 was significantly above ( $P<0.001$ ) that of ET-1. The  $\text{ET}_B$ -specific antagonist RES-701-1 did not compete with  $^{125}\text{I}$ -ET-1 until relatively high concentrations (producing a 15% reduction in specific binding at  $3 \times 10^{-7} \text{ mol l}^{-1}$  and 50% reduction at  $10^{-6} \text{ mol l}^{-1}$  RES-701-1; data not shown).

### Discussion

These data provide the first pharmacological characterization of an endothelin receptor in a fish gill, or any tissue in a fish. They suggest that there is a single endothelin receptor expressed (Fig. 1), with kinetic characteristics ( $K_d$ ,  $B_{\text{max}}$ ) quite similar to those described for the binding of ET-1 to mammalian vascular endothelin receptors (Table 1). Since a heterologous ligand was used (human ET-1), it is clear that the fish gill ET receptor must share significant homology with the mammalian receptor. The fact that ET-3 is as competitive as ET-1 at the single site (Fig. 2) suggests that the gill receptor is an  $\text{ET}_B$ , because that is the promiscuous receptor that binds to all native ligands equally (e.g. Huggins et al., 1993; Masaki et al., 1994). This hypothesis is supported by our finding that three  $\text{ET}_B$ -specific receptor agonists (SRX S6c, IRL-1620 and BQ-3020; e.g. Masaki et al., 1994) each competed with  $^{125}\text{I}$ -ET-1 at a single site with a relatively low  $\text{IC}_{50}$ , equivalent to that for ET-1 in each case except for BQ-3020 (Fig. 3). In the rat aorta and atrium (in which  $\text{ET}_A$  is the predominant receptor expressed), ET-1 is 50 000 times more potent than SRX S6c in displacing  $^{125}\text{I}$ -ET-1 (Williams et al., 1991). IRL-1620 has an  $\text{ET}_B/\text{ET}_A$  selectivity of 120 000 in binding experiments (Takai et al., 1992), but BQ-3020 has a lower ratio of selectivity (4700; Saeki et al., 1991). Our data are also consistent with our

previous study (Evans et al., 1996), which demonstrated that the ET-1-induced contraction of the ventral aorta from *S. acanthias* was mediated by a single receptor with nearly equivalent sensitivity to ET-1, ET-3 and SRX S6c and no sensitivity to BQ-123, the well-described  $\text{ET}_A$ -specific antagonist (e.g. Ihara et al., 1992).

Although the hypothesis that the  $\text{ET}_B$  receptors which mediate dilation (termed  $\text{ET}_{B1}$ ) are distinct from the  $\text{ET}_B$  receptors that mediate contraction (termed  $\text{ET}_{B2}$ ; e.g. Stjernquist, 1998) is not universally accepted (e.g. Clozel and Gray, 1995), many studies have demonstrated differences in the sensitivity of  $\text{ET}_B$  receptors to specific agonists and antagonists. It has been suggested that the putative  $\text{ET}_{B1}$  receptor is sensitive to the agonist IRL-1620 and the antagonist RES-701-1 (e.g. Sudjarwo et al., 1994; Brooks et al., 1995; Zuccarello et al., 1998b), while the  $\text{ET}_{B2}$  receptor is insensitive to either substance. The receptor in the shark gill was extremely sensitive to IRL-1620 (Fig. 3), but the putative  $\text{ET}_{B1}$  receptor antagonist, RES-701-1, showed little or no competition with  $^{125}\text{I}$ -ET-1. In addition, our earlier physiological studies demonstrated that RES-701-1 did not inhibit the ET-1 stimulated contraction of aortic rings from this species (D. H. Evans and M. P. Gunderson, unpublished data). These data suggest that the shark  $\text{ET}_B$  receptor shares characteristics with both the putative  $\text{ET}_{B1}$  and  $\text{ET}_{B2}$  receptors that have been proposed for mammals (e.g. Stjernquist, 1998).

Our data do not allow us to delineate specific sites for the  $\text{ET}_B$  receptor in the *S. acanthias* gill, but two recent studies (Sundin and Nilsson, 1998; Stenslokken et al., 1999) have demonstrated that ET receptors may produce a redistribution of blood flow within the gill lamellae of the rainbow trout (*O. mykiss*) and Atlantic cod (*G. morhua*) by constriction of pillar cells. In their experiments, ET-1 increased blood flow to the periphery of the lamellae, which presumably alters the epithelial surface area for gas exchange or passive movements of ions. Whether ET receptors are expressed on pillar cells or in microvessels in the shark gill remains to be determined, as does its putative role in gill hemodynamics.

Gill ET receptors also may play a role in controlling other gill functions, such as osmoregulation, acid–base regulation and nitrogen excretion. ET-1 has been shown to stimulate

Na<sup>+</sup>-K<sup>+</sup>-activated ATPase in both the rat adrenal zona glomerulosa (Pecci et al., 1994) and cerebral capillary endothelium (Kawai et al., 1995); but it inhibited this enzyme in inner medullary collecting duct cells in the kidney of the rabbit (Zeidel et al., 1989). However, ET-1 did not affect the activity of Na<sup>+</sup>-K<sup>+</sup>-activated ATPase in rabbit colonic mucosa (Roden et al., 1992). ET-1 stimulated Na<sup>+</sup>-K<sup>+</sup>-Cl<sup>-</sup> transport (Vigne, 1994; Kawai et al., 1995) and Na<sup>+</sup>/H<sup>+</sup> exchange (Vigne et al., 1991) in the rat cerebral capillary endothelium as well as a Cl<sup>-</sup> channel in the rat colonic mucosa (Hosokawa et al., 1995). It also inhibited influx of Na<sup>+</sup> through an apical, amiloride-sensitive channel in the colonic mucosa (Hosokawa et al., 1995). ET-1, however, inhibited both Na<sup>+</sup>/H<sup>+</sup> exchange and V-type H<sup>+</sup> pump activity in cultured bovine corneal epithelial cells (Wu et al., 1998). The transport mechanisms whereby Na<sup>+</sup> and Cl<sup>-</sup> cross the epithelium of the fish gill are well characterized, especially in the teleosts, and there is functional evidence that all of these proteins that have been shown to be affected by ET-1 are expressed and mediate various pathways for NaCl extrusion or uptake (depending on the salinity) as well as acid-base regulation (see Evans et al., 1999). It is likely, therefore, that ET may play a role in gill solute transport as well as gill hemodynamics. In fact, our preliminary data (D. H. Evans and K. J. Karnaky, unpublished) suggest that both ET-1 and SRX S6c inhibit the short-circuit current, dose-dependently, across the opercular skin from the killifish, *Fundulus heteroclitus*, which is the standard model for salt extrusion by the marine teleost gill (e.g. Karnaky, 1998).

This work was supported by NSF grants IBN-9306997 and IBN-9604824 and American Heart Association (Maine Affiliate) grant 9507715S to D.H.E., as well as NIEHS grant P30-ESO3238 to the Center for Membrane Toxicity Studies at the Mount Desert Island Biological Laboratory.

## References

- Bax, W. A. and Saxena, P. R.** (1994). The current endothelin receptor classification: time for reconsideration? *Trends Pharmacol. Sci.* **15**, 379–386.
- Brooks, D. P., DePalma, P. D., Pullen, M., Gellai, M. and Nambi, P.** (1995). Identification and function of putative ET<sub>B</sub> receptor subtypes in the dog kidney. *J. Cardiovasc. Pharmacol.* **26**, S322–325.
- Cheng, Y. and Prusoff, W. H.** (1973). Relationship between the inhibition constant ( $K_i$ ) and the concentration of inhibitor which causes 50 per cent inhibition ( $I_{50}$ ) of an enzymatic reaction. *Biochem. Pharmacol.* **22**, 3099–3108.
- Clozel, M. and Gray, G. A.** (1995). Are there different ET<sub>B</sub> receptors mediating constriction and relaxation? *J. Cardiovasc. Pharmacol.* **26**, S262–264.
- Davenport, A. P., O'Reilly, G. and Kuc, R. E.** (1995). Endothelin ET<sub>A</sub> and ET<sub>B</sub> mRNA and receptors expressed by smooth muscle in the human vasculature: majority of the ET<sub>A</sub> sub-type. *Br. J. Pharmacol.* **114**, 1110–1116.
- De Leon, H. and Garcia, R.** (1995). Characterization of endothelin receptor subtypes in isolated rat renal preglomerular microvessels. *Regul. Pept.* **60**, 1–8.
- De Nucci, G., Thomas, R., D-Orleans-Juste, P., Antunes, E., Walder, C., Warner, T. D. and Vane, J. R.** (1988). Pressor effects of circulating endothelin are limited by its removal in the pulmonary circulation and by the release of protacyclin and endothelium-derived relaxing factor. *Proc. Natl. Acad. Sci. USA* **85**, 9797–9800.
- Donald, J. A., Toop, T. and Evans, D. H.** (1994). Localization and analysis of natriuretic peptide receptors in the gills of the gulf toadfish, *Opsanus beta*. *Am. J. Physiol.* **267**, R1437–R1444.
- Donald, J. A., Toop, T. and Evans, D. H.** (1997). Distribution and characterization of natriuretic peptide receptors in the gills of the spiny dogfish, *Squalus acanthias*. *Gen. Comp. Endocrinol.* **106**, 338–347.
- Edwards, R. M. and Trizna, W.** (1995). Characterization of <sup>125</sup>I-endothelin-1 binding to rat and rabbit renal microvasculature. *J. Pharmacol. Exp. Ther.* **274**, 1084–1089.
- Evans, D. H.** (1998). *The Physiology of Fishes*, pp. 519. Boca Raton: CRC Press.
- Evans, D. H., Gunderson, M. and Cegelis, C.** (1996). ET<sub>B</sub>-type receptors mediate endothelin-stimulated contraction in the aortic vascular smooth muscle of the spiny dogfish shark, *Squalus acanthias*. *J. Comp. Physiol.* **165**, 659–664.
- Evans, D. H., Piermarini, P. M. and Potts, W. T. W.** (1999). Ionic transport in the fish gill epithelium. *J. Exp. Zool.* **283**, 641–652.
- Hiley, C. R.** (1995). Endothelin receptor ligands. *Neurotransmissions* **11**, 1–6.
- Hosokawa, M., Tsukada, H., Ueda, S., Sakai, M., Okuma, M., Oda, K., Takimoto, M., Okada, T. and Urade, Y.** (1995). Regulation of ion transport by endothelins in rat colonic mucosa: effects of an ET<sub>A</sub> antagonist (FR139317) and an ET<sub>B</sub> agonist (IRL1620). *J. Pharmacol. Exp. Ther.* **273**, 1313–1322.
- Huggins, J. P., Pelton, J. T. and Miller, R. C.** (1993). The structure and specificity of endothelin receptors: Their importance in physiology and medicine. *Pharmacol. Ther.* **59**, 55–123.
- Ihara, M., Noguchi, K., Saeki, T., Fukuroda, T., Tsuchida, S., Kimura, S., Fukami, T., Ishikawa, K., Nishikibe, M. and Yano, M.** (1992). Biological profiles of highly potent novel endothelin antagonists selective for the ET<sub>A</sub> receptor. *Life Sci.* **50**, 247–255.
- Karnaky, K. J., Jr.** (1998). Osmotic and Ionic Regulation. In *The Physiology of Fishes* (ed. D. H. Evans), pp. 157–176. Boca Raton: CRC Press.
- Kasuya, Y., Kobayashi, H. and Uemura, H.** (1991). Endothelin-like immunoreactivity in the nervous system of invertebrates and fish. *J. Cardiovasc. Pharmacol.* **17**, S463–466.
- Kawai, N., Yamamoto, T., Yamamoto, H., McCarron, R. M. and Spatz, M.** (1995). Endothelin 1 stimulates Na<sup>(+)</sup>, K<sup>(+)</sup>-ATPase and Na<sup>(+)</sup>-K<sup>(+)</sup>-Cl<sup>(-)</sup> cotransport through ET<sub>A</sub> receptors and protein kinase C-dependent pathway in cerebral capillary endothelium. *J. Neurochem.* **65**, 1588–1596.
- Kennedy, R. L., Haynes, W. G. and Webb, D. J.** (1993). Endothelins as regulators of growth and function in endocrine tissues. *Clin. Endocrinol.* **39**, 259–265.
- Masaki, T.** (1993). Endothelins: Homeostatic and compensatory actions in the circulatory and endocrine systems. *Endocrinol. Rev.* **14**, 256–268.
- Masaki, T., Vane, J. R. and Vanhoutte, P. M.** (1994). V. International Union of Pharmacology nomenclature of endothelin receptors. *Pharmacol. Rev.* **46**, 137–142.
- Olson, K. R., Duff, D. W., Farrell, A. P., Keen, J., Kellogg, M. D.,**

- Kullman, D. and Villa, J.** (1991). Cardiovascular effects of endothelin in trout. *Am. J. Physiol.* **260**, H1214–H1223.
- Pecci, A., Cozza, E. N., Devlin, M., Gomez-Sanchez, C. E. and Gomez-Sanchez, E. P.** (1994). Endothelin-1 stimulation of aldosterone and zona glomerulosa ouabain-sensitive sodium/potassium-ATPase. *J. Steroid. Biochem. Mol. Biol.* **50**, 49–53.
- Pollock, D. M. and Opgenorth, T. J.** (1993). Evidence for endothelin-induced renal vasoconstriction independent of ET<sub>A</sub> receptor activation. *Am. J. Physiol.* **264**, R222–R226.
- Poder, T. C., Silberberg, S. D. and Rampe, D.** (1991). Contraction of reptile, amphibian, and fish blood vessels by endothelin-1. *Can. J. Physiol. Pharmacol.* **69**, 215–217.
- Roden, M., Plass, H., Vierhapper, H. and Turnheim, K.** (1992). Endothelin-1 stimulates chloride and potassium secretion in rabbit descending colon. *Pflügers Arch.* **421**, 163–167.
- Rubanyi, G. M. and Polokoff, M. A.** (1994). Endothelins: Molecular biology, biochemistry, pharmacology, physiology, and pathophysiology. *Pharmacol. Rev.* **46**, 325–415.
- Saeki, T., Ihara, M., Fukuroda, T., Yamagiwa, M. and Yano, M.** (1991). [Ala<sup>1,3,11,15</sup>]endothelin-1 analogs with ET<sub>B</sub> agonistic activity. *Biochem. Biophys. Res. Commun.* **179**, 285–292.
- Spokes, R. A., Ghatei, M. A. and Bloom, S. R.** (1989). Studies with endothelin 3 and endothelin 1 on rat blood pressure and isolated tissues: evidence for multiple endothelin receptor subtypes. *J. Cardiovasc. Pharmacol.* **13** (Suppl. 5), S191–192.
- Stenslokken, K. O., Sundin, L. and Nilsson, G. E.** (1999). Cardiovascular and gill microcirculatory effects of endothelin-1 in Atlantic cod: evidence for pillar cell contraction. *J. Exp. Biol.* **202**, 1151–1157.
- Stjernquist, M.** (1998). Endothelins – vasoactive peptides and growth factors. *Cell Tissue. Res.* **292**, 1–9.
- Sudjarwo, S. A., Hori, M., Tanaka, T., Matsuda, Y., Okada, T. and Karaki, H.** (1994). Subtypes of endothelin ET<sub>A</sub> and ET<sub>B</sub> receptors mediating venous smooth muscle contraction. *Biochem. Biophys. Res. Commun.* **200**, 627–633.
- Sundin, L. and Nilsson, G. E.** (1998). Endothelin redistributes blood flow through the lamellae of rainbow trout gills: evidence for pillar cell contraction. *J. Comp. Physiol. B* **168**, 619–623.
- Sumner, M. J., Cannon, T. R., Mundin, J. W., White, D. G. and Watts, I. S.** (1992). Endothelin ET<sub>A</sub> and ET<sub>B</sub> receptors mediate vascular smooth muscle contraction. *Br. J. Pharmacol.* **107**, 858–860.
- Sverdrup, A., Krüger, P. G. and Helle, K. B.** (1994). Role of the endothelin in regulation of vascular functions in two teleosts. *Acta Physiol. Scand.* **152**, 219–233.
- Takai, M., Umemura, I., Yamasaki, K., Watakabe, T., Fujitani, Y., Oda, K., Urade, Y., Inui, T., Yamamura, T. and Okada, T.** (1992). A potent and specific agonist, Suc-[Glu<sup>9</sup>, Ala<sup>11,15</sup>] endothelin 1 (8–21), IRL 1620, for the ET<sub>B</sub> receptor. *Biochem. Biophys. Res. Commun.* **184**, 953–959.
- Tamirisa, P., Frishman, W. H. and Kumar, A.** (1995). Endothelin and endothelin antagonism: Roles in cardiovascular health and disease. *Am. Heart J.* **130**, 601–610.
- Teerlink, J. R., Breu, V., Sprecher, U., Clozel, M. and Clozel, J. P.** (1994). Potent vasoconstriction mediated by endothelin ET<sub>B</sub> receptors in canine coronary arteries. *Circ. Res.* **74**, 105–114.
- Toop, T., Donald, J. A. and Evans, D. H.** (1995). Localisation and characteristics of natriuretic peptide receptors in the gills of the Atlantic hagfish, *Myxine glutinosa* (Agnatha). *J. Exp. Biol.* **198**, 117–126.
- Vigne, P., Farre, A. L. and Frelin, C.** (1994). Na<sup>+</sup>-K<sup>+</sup>-Cl<sup>-</sup> cotransporter of brain capillary endothelial cells: properties and regulation by endothelins hyperosmolar solutions, calcyculinA, and interleukin-1. *J. Biol. Chem.* **269**, 19925–19930.
- Vigne, P., Ladoux, A. and Frelin, C.** (1991). Endothelins activate Na<sup>+</sup>/H<sup>+</sup> exchange in brain capillary endothelial cells via a high affinity endothelin-3 receptor that is not coupled to phospholipase C. *J. Biol. Chem.* **266**, 5925–5928.
- Warner, T. D., Allcock, G. H., Mickleby, E. J., Corder, R. and Vane, J. R.** (1993). Comparative studies with the endothelin receptor antagonists BQ-123 and PD 142893 indicate at least three endothelin receptors. *J. Cardiovasc. Pharmacol.* **22**, S117–S120.
- White, D. G., Garratt, H., Mundin, J. W., Sumner, M. J., Vallance, P. J. and Watts, I. S.** (1994). Human saphenous vein contains both endothelin ET<sub>A</sub> and ET<sub>B</sub> contractile receptors. *Eur. J. Pharmacol.* **257**, 307–310.
- Williams, D. L., Jr., Jones, K. L., Pettibone, D. J., Lis, E. V. and Clineschmidt, B. V.** (1991). Sarafotoxin S6c: an agonist which distinguishes between endothelin receptor subtypes. *Biochem. Biophys. Res. Commun.* **175**, 556–561.
- Wu, X., Torres-zamorano, V., Yang, H. and Reinach, P. S.** (1998). ET<sub>A</sub> receptor-mediated inhibition of intracellular pH regulation in cultured bovine corneal epithelial cells. *Exp. Eye Res.* **66**, 699–708.
- Yu, J. C., Pickard, J. D. and Davenport, A. P.** (1995). Endothelin ET<sub>A</sub> receptor expression in human cerebrovascular smooth muscle cells. *Br. J. Pharmacol.* **116**, 2441–2446.
- Zaccone, G., Mauceri, A., Fasulo, S., Ainis, L., Lo Cascio, P. and Ricca, M. B.** (1996). Localization of immunoreactive endothelin in the neuroendocrine cells of fish gill. *Neuropeptides* **30**, 53–57.
- Zeidel, M. L., Brady, H. R., Kone, B. C., Gullans, S. R. and Brenner, B. M.** (1989). Endothelin, a peptide inhibitor of Na<sup>(+)</sup>-K<sup>(+)</sup>-ATPase in intact renal tubular epithelial cells. *Am. J. Physiol.* **257**, C1101–1107.
- Zuccarello, M., Boccaletti, R. and Rapoport, R. M.** (1998a). Endothelin ET<sub>(B)</sub> receptor-mediated constriction in the rabbit basilar artery. *Eur. J. Pharmacol.* **350**, R7–9.
- Zuccarello, M., Boccaletti, R. and Rapoport, R. M.** (1998b). Endothelin ET<sub>(B)</sub> receptor-mediated relaxation of rabbit basilar artery. *Eur. J. Pharmacol.* **357**, 67–71.
